# Supplementary material for: Contrasted Impacts of Yellow Flag Iris (Iris pseudacorus) on Plant Diversity in Tidal Wetlands within Its Native and Invaded Distribution Ranges
Source: MDPI journal article supplement (doi:10.3390/d14050326), 2022-04-22
Supplement: s1 [file s1]

# **Contrasted impacts of yellow flag iris (*Iris pseudacorus*) on plant diversity in tidal wetlands within its native and invaded distribution ranges**

Blanca Gallego-Tévar , Brenda J. Grewell, Christine R. Whitcraft, Joy C. Futrell, Gael Bárcenas-Moreno and Jesús M. Castillo

**Table S1.** Geographical coordinates and number of study patches for locations colonized by native and invasive *Iris pseudacorus* populations. Locations are numbered from the most inland location to the closest to the sea.

| <i>Iris pseudacorus</i> locations                        | Geographical coordinates      | Number of patches |
|----------------------------------------------------------|-------------------------------|-------------------|
| Native range (Guadalquivir River Estuary, Andalusia)     |                               |                   |
| A1                                                       | 37°25'7.8" N, 6°0'32.8" E     | 7                 |
| A2                                                       | 37°22'36.4" N, 6°1'16.1" E    | 8                 |
| A3                                                       | 37°4'30.0" N, 6°5'22.5" E     | 8                 |
| A4                                                       | 37°1'55.8" N, 6°8'26.9" E     | 7                 |
| A5                                                       | 37°1'34.0" N, 6°9'25.1" E     | 8                 |
| Invaded range (Sacramento-San Joaquin Delta, California) |                               |                   |
| C1                                                       | 37°58'37.4" N, 121°22'15.5" W | 8                 |
| C2                                                       | 38°7'1.4" N, 121°41'1.1" W    | 8                 |
| C3                                                       | 38°1'15.5" N, 121°49'19.6" W  | 8                 |
| C4                                                       | 38°5'47.7" N, 121°53'38.5" W  | 8                 |
| C5                                                       | 38°4'14.2" N, 122°11'16.5" W  | 7                 |
|                                                          | 38°3'52.6" N, 122°12'6.2" W   |                   |

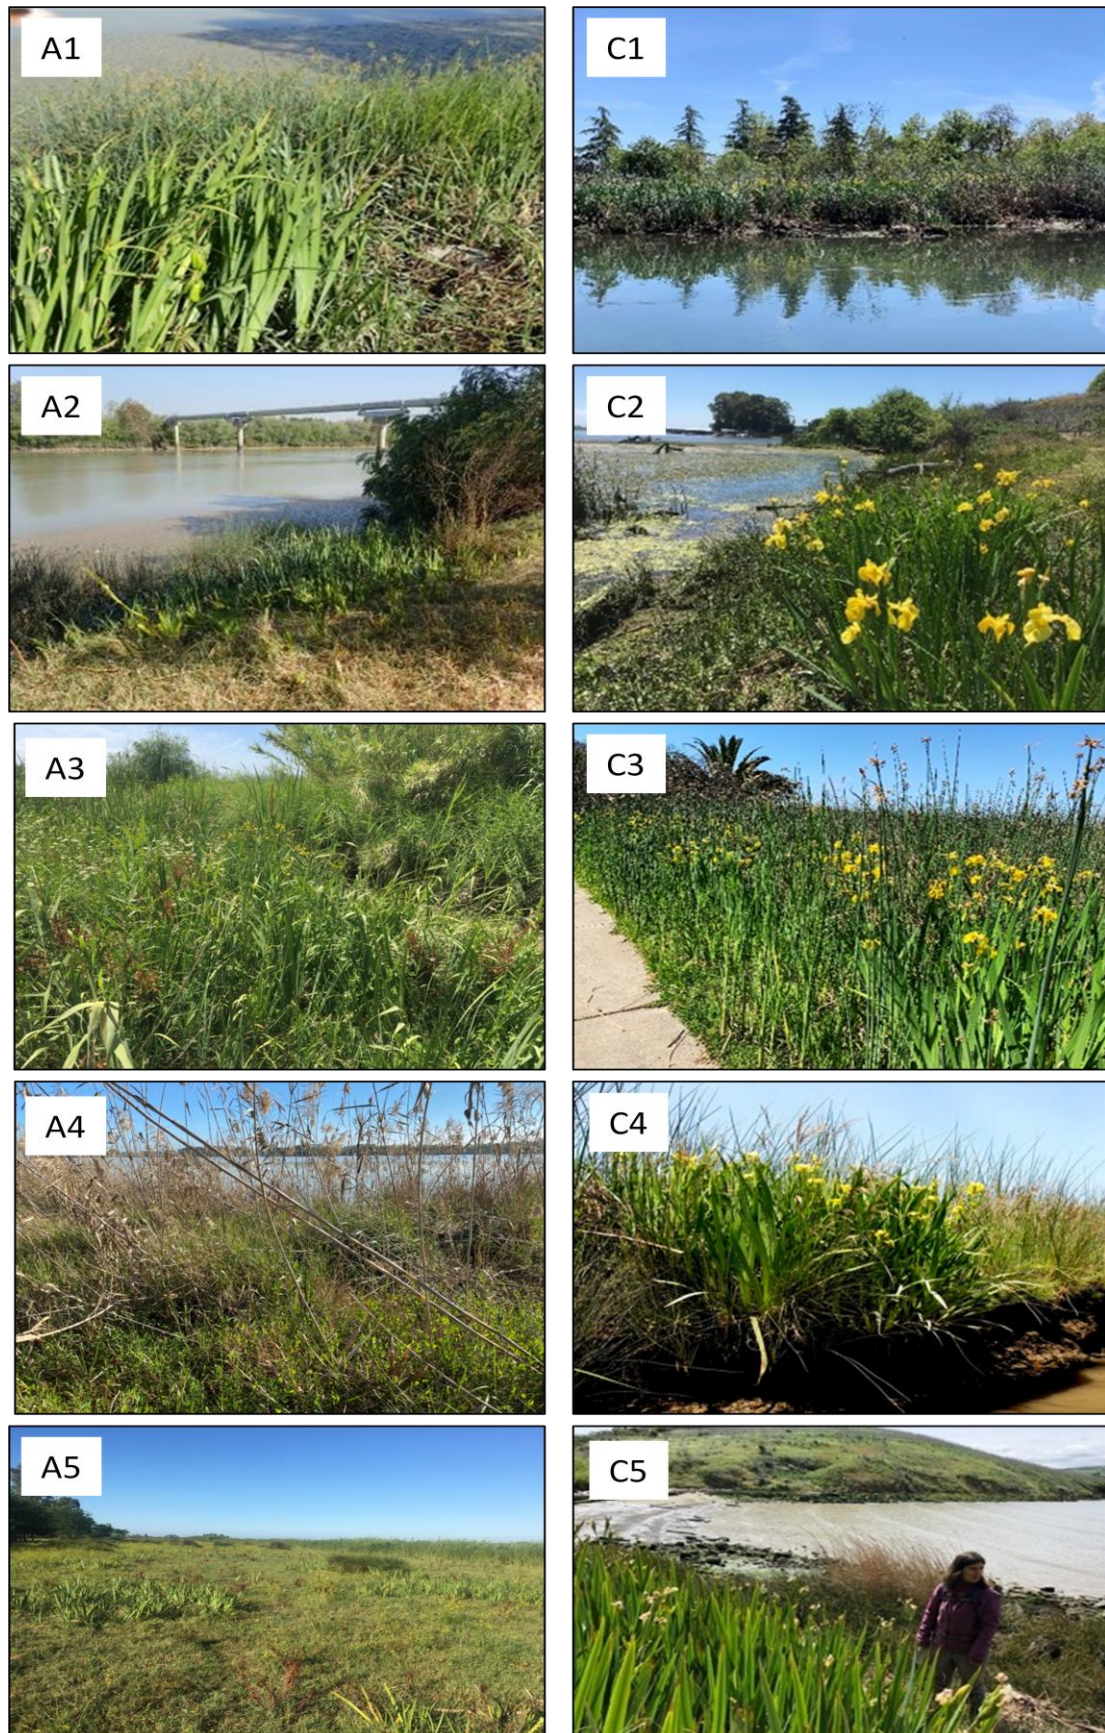

**Figure S1.** Field pictures of sampled locations colonized by *Iris pseudacorus* in its native (Guadalquivir River Estuary, Andalusia, Spain, A1-A5) and the invaded range (Sacramento-San Joaquin Delta Estuary, California, USA, C1-C5).

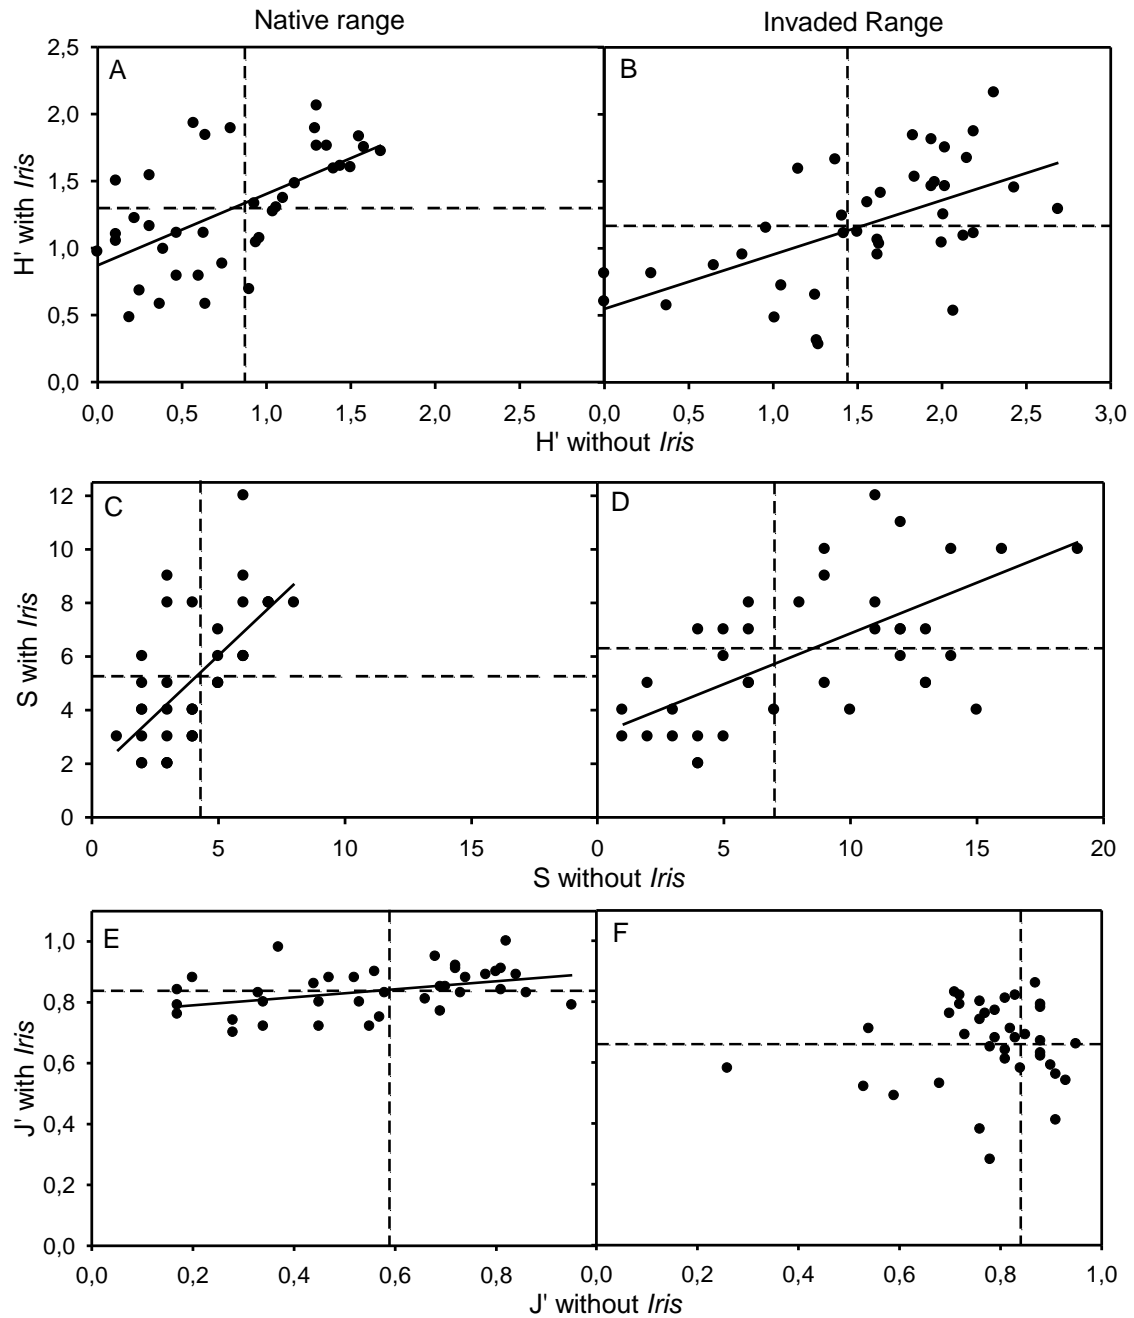

**Figure S2.** Relationship between the  $\alpha$ -diversity ( $H'$ ), plant species richness ( $S$ ) and evenness ( $J'$ ) with and without *Iris pseudacorus* in native (Guadalquivir Estuary) and invaded (San Francisco Bay-Delta Estuary) distribution ranges. Dashed lines indicate means values. Regression equations: A,  $y = 0.871 + 0.533x$  ( $R = 0.598$ ,  $P < 0.0001$ ,  $n = 38$ ); B,  $y = 0.548 + 0.405x$  ( $R = 0.581$ ,  $P < 0.0001$ ,  $n = 39$ ); C,  $y = 1.581 + 0.891x$  ( $R = 0.445$ ,  $P < 0.005$ ,  $n = 38$ ); D,  $y = 3.074 + 0.379x$  ( $R = 0.624$ ,  $P < 0.0001$ ,  $n = 39$ ); E,  $y = 0.764 + 0.132x$  ( $R = 0.397$ ,  $P = 0.015$ ,  $n = 37$ ).

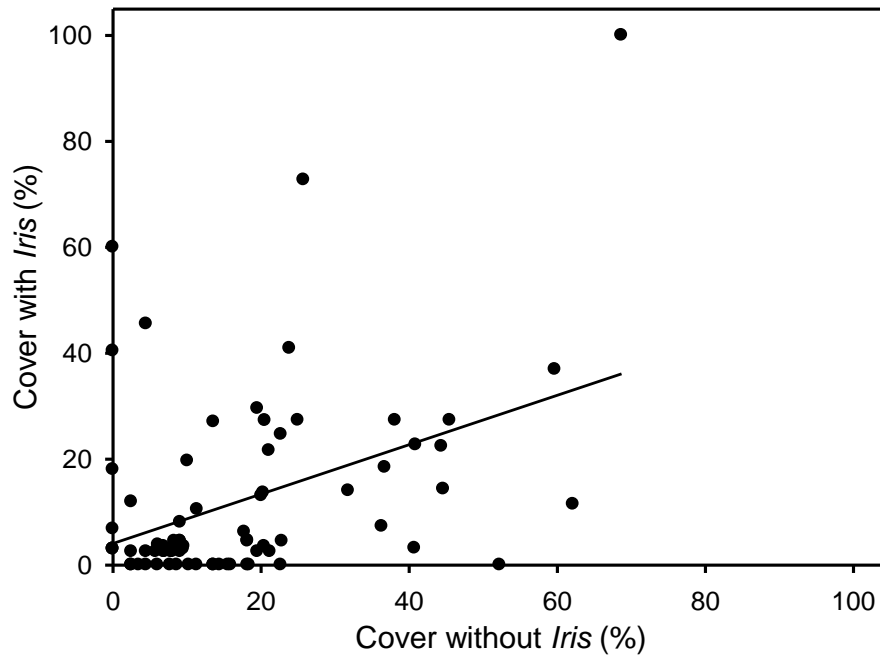

**Figure S3.** Relationship between cover (%) of plant taxa in paired plots with and without invasive *Iris pseudacorus* in *Iris*-invaded study locations in tidal wetlands along an estuarine gradient in the San Francisco Bay-Delta Estuary (California, USA). Regression equation:  $y = 4.076 + 0.467 x$  ( $R = 0.408$ ,  $P < 0.0001$ ,  $n = 75$ ).

**Table S2.** Native and exotic plant taxa growing without and with *Iris pseudacorus* in the Guadalquivir River Estuary.

| Plant taxa                                         | Family         | Without <i>Iris</i> | With <i>Iris</i> | Native (N) / Exotic (E) |
|----------------------------------------------------|----------------|---------------------|------------------|-------------------------|
| <i>Agropogon lutosus</i> (Poir.) P. Fourn.         | Poaceae        | X                   | -                | N                       |
| <i>Arundo donax</i> L.                             | Poaceae        | -                   | X                | E                       |
| <i>Atriplex chenopodioides</i> Batt.               | Amaranthaceae  | X                   | X                | N                       |
| <i>Atriplex prostrata</i> Boucher EX. DC.          | Amaranthaceae  | X                   | X                | N                       |
| <i>Bolboschoenus maritimus</i> (L.) Palla          | Cyperaceae     | X                   | X                | N                       |
| <i>Carex divisa</i> Huds.                          | Cyperaceae     | X                   | X                | N                       |
| <i>Carex otrubae</i> Podp.                         | Cyperaceae     | X                   | -                | N                       |
| <i>Carex</i> sp.                                   | Cyperaceae     | X                   | -                | N                       |
| <i>Cichorium intybus</i> L.                        | Asteraceae     | X                   | -                | N                       |
| <i>Convolvulus arvensis</i> L.                     | Convolvulaceae | X                   | X                | N                       |
| <i>Cynodon dactylon</i> (L) Pers.                  | Poaceae        | X                   | X                | N                       |
| <i>Cyperus eragrostis</i> Lam.                     | Cyperaceae     | X                   | X                | N                       |
| <i>Cyperus laevigatus</i> L.                       | Cyperaceae     | X                   | -                | N                       |
| <i>Cyperus longus</i> L.                           | Cyperaceae     | X                   | X                | N                       |
| <i>Datura stramonium</i> L.                        | Solanaceae     | X                   | -                | E                       |
| <i>Equisetum ramosissimum</i> Desf.                | Equisetaceae   | X                   | X                | N                       |
| <i>Euphorbia hirsute</i> L.                        | Euphorbiaceae  | X                   | X                | N                       |
| <i>Galium</i> sp.                                  | Rubiaceae      | X                   | X                | N                       |
| <i>Juncus maritimus</i> Lam.                       | Juncaceae      | X                   | X                | N                       |
| <i>Lotus angustissimus</i> L.                      | Fabaceae       | X                   | X                | N                       |
| <i>Lycopus europaeus</i> L.                        | Lamiaceae      | X                   | X                | N                       |
| <i>Lythrum salicaria</i> L.                        | Lithraceae     | X                   | X                | N                       |
| <i>Oenanthe lachenalii</i> C.C. Gmel.              | Apiaceae       | X                   | X                | N                       |
| <i>Phragmites australis</i> (Cav.) Trin. EX. Steud | Poaceae        | X                   | X                | N                       |
| <i>Plantago latifolia</i> Salisb.                  | Plantaginaceae | X                   | -                | N                       |
| <i>Polygonum equisetiforme</i> Sm.                 | Polygonaceae   | X                   | X                | N                       |
| <i>Polygonum salicifolium</i> Brouss.              | Polygonaceae   | X                   | X                | N                       |
| <i>Rumex conglomerates</i> Murray                  | Polygonaceae   | X                   | -                | N                       |
| <i>Senecio gallicus</i> Vill.                      | Asteraceae     | X                   | X                | N                       |
| <i>Trifolium repens</i> L.                         | Fabaceae       | X                   | X                | N                       |
| <i>Typha angustifolia</i> L.                       | Typhaceae      | -                   | X                | N                       |
| <i>Verbena officinalis</i> L.                      | Lamiaceae      | X                   | -                | N                       |



**Table S3.** Native and exotic plant taxa growing without and with *Iris pseudacorus* in the Sacramento-San Joaquin Delta Estuary.

| Plant taxa                                                                                  | Family         | Without     | With        | Native (N) /<br>Exotic (E) |
|---------------------------------------------------------------------------------------------|----------------|-------------|-------------|----------------------------|
|                                                                                             |                | <i>Iris</i> | <i>Iris</i> |                            |
| <i>Alisma plantago-aquatica</i> L.                                                          | Alismataceae   | X           | -           | N                          |
| <i>Ambrosia psilostachya</i> DC.                                                            | Asteraceae     | X           | X           | N                          |
| <i>Ammania coccinea</i> Rottb.                                                              | Lythraceae     | X           | -           | N                          |
| <i>Arundo donax</i> L.                                                                      | Poaceae        | X           | X           | E                          |
| <i>Symphyotrichum lentum</i> (Greene) G.L. Nesom                                            | Asteraceae     | X           | X           | N                          |
| <i>Atriplex prostrata</i> Boucher ex DC                                                     | Chenopodiaceae | X           | X           | E                          |
| <i>Azolla filiculoides</i> Lam.                                                             | Azollaceae     | X           | X           | N                          |
| <i>Bidens frondosa</i> L.                                                                   | Asteraceae     | X           | X           | N                          |
| <i>Calystegia sepium</i> (L.) R.Br. ssp. <i>limnophila</i> (Greene) Brummitt                | Convolvulaceae | X           | X           | N                          |
| <i>Cephalanthus occidentalis</i> L.                                                         | Rubiaceae      | X           | X           | N                          |
| <i>Crassula aquatica</i> (L.) Schönl                                                        | Crassulaceae   | X           | -           | N                          |
| <i>Cyperus eragrostis</i> Lam.                                                              | Cyperaceae     | X           | X           | N                          |
| <i>Deschampsia cespitosa</i> (L.) P. Beauv. subsp. <i>holciformis</i> (J. Presl) W.E. Lawr. | Poaceae        | X           | X           | N                          |
| <i>Distichlis spicata</i> (L.) Greene                                                       | Poaceae        | X           | X           | N                          |
| <i>Echinochloa crus-galli</i> (L.) P. Beauv.                                                | Poaceae        | X           | X           | E                          |
| <i>Eichhornia crassipes</i> (Mart.) Solms                                                   | Pontederiaceae | X           | X           | E                          |
| <i>Eleocharis parvula</i> (Roem. & Schult.) Link ex Bluff, Nees, & Schauer                  | Cyperaceae     | X           | -           | N                          |
| <i>Epilobium ciliatum</i> Raf. subsp. <i>ciliatum</i>                                       | Onagraceae     | X           | X           | N                          |
| <i>Elymus triticoides</i> Buckle                                                            | Poaceae        | -           | X           | N                          |
| <i>Eryngium articulatum</i> Hook.                                                           | Apiaceae       | X           | -           | N                          |
| <i>Erythranthe guttata</i> (DC.) G.L. Nesom                                                 | Phrymaceae     | X           | X           | N                          |
| <i>Euthamia occidentalis</i> Nutt.                                                          | Asteraceae     | X           | -           | N                          |
| <i>Festuca rubra</i> L.                                                                     | Poaceae        | X           | X           | N                          |
| <i>Foeniculum vulgare</i> Mill.                                                             | Apiaceae       | X           | X           | E                          |
| <i>Galium aparine</i> L.                                                                    | Rubiaceae      | -           | X           | N                          |
| <i>Galium trifidum</i> L.                                                                   | Rubiaceae      | X           | -           | N                          |
| <i>Grindelia stricta</i> DC.                                                                | Asteraceae     | X           | -           | N                          |
| <i>Helenium bigelovii</i> A. Gray                                                           | Asteraceae     | X           | X           | N                          |
| <i>Helianthus californicus</i> Fisch. & C.A. Mey                                            | Asteraceae     | X           | -           | N                          |
| <i>Hydrocotyle umbellata</i> L.                                                             | Araliaceae     | X           | X           | N                          |
| <i>Hydrocotyle verticillata</i> Thunb.                                                      | Araliaceae     | X           | X           | N                          |
| <i>Jaumea carnosa</i> (Less.) A. Gray                                                       | Asteraceae     | X           | X           | N                          |
| <i>Juncus balticus</i> Willd.                                                               | Juncaceae      | X           | X           | N                          |
| <i>Juncus effusus</i> L.                                                                    | Juncaceae      | X           | X           | N                          |
| <i>Juncus xiphioides</i> E. Mey.                                                            | Juncaceae      | X           | X           | N                          |
| <i>Lathyrus jepsonii</i> Greene var. <i>jepsonii</i>                                        | Fabaceae       | X           | -           | N                          |
| <i>Leersia oryzoides</i> (L.) Sw.                                                           | Poaceae        | X           | X           | N                          |
| <i>Lepidium latifolium</i> L.                                                               | Brassicaceae   | X           | X           | E                          |
| <i>Lemna minor</i> L.                                                                       | Araceae        | X           | -           | N                          |
| <i>Lotus corniculatus</i> L.                                                                | Fabaceae       | X           | X           | E                          |
| <i>Ludwigia hexapetala</i> Hook. & Arn.) Zardini, H. Gu, P.H. Raven                         | Onagraceae     | X           | X           | E                          |
| <i>Ludwigia peploides</i> (Kunth) P.H.                                                      | Onagraceae     | X           | X           | E                          |

|                                                                                                                    |                |   |   |    |
|--------------------------------------------------------------------------------------------------------------------|----------------|---|---|----|
| <i>Lythrum californicum</i> Torr. & A. Gray                                                                        | Lythraceae     | X | X | N  |
| <i>Mentha arvensis</i> L.                                                                                          | Lamiaceae      | X | - | E  |
| <i>Mentha aquatica</i> L.                                                                                          | Lamiaceae      | X | X | E  |
| <i>Oenanthe sarmentosa</i> C. Presl ex CD.                                                                         | Apiaceae       | X | X | N  |
| <i>Paspalum distichum</i> L.                                                                                       | Poaceae        | X | X | N  |
| <i>Passiflora caerulea</i> L.                                                                                      | Passifloraceae | - | X | E  |
| <i>Persicaria amphibia</i> (L.) Delarbe                                                                            | Polygonaceae   | - | X | N  |
| <i>Persicaria hydropiperoides</i> (Michx.) Small                                                                   | Polygonaceae   | X | X | N  |
| <i>Persicaria lapathifolia</i> (L.) Delarbe                                                                        | Polygonaceae   | - | X | N  |
| <i>Persicaria punctata</i> (Elliott) Small                                                                         | Polygonaceae   | X | X | N  |
| <i>Phalaris aquatica</i> L.                                                                                        | Poaceae        | X | X | E  |
| <i>Phragmites australis</i> (Cav.) Steud.                                                                          | Poaceae        | X | - | N? |
| <i>Pluchea odorata</i> (L.) Cass.                                                                                  | Asteraceae     | X | X | N  |
| <i>Plantago subnuda</i> Pilg.                                                                                      | Plantaginaceae | X | X | N  |
| <i>Potentilla anserina</i> L. sbsp. <i>pacifica</i> (Howell) Rousi                                                 | Rosaceae       | X | X | N  |
| <i>Polypogon monspeliensis</i> (L.) Desf.                                                                          | Poaceae        | X | X | E  |
| <i>Rubus armeniacus</i> Focke                                                                                      | Rosaceae       | X | X | E  |
| <i>Rubus ursinus</i> Cham. & Schltdl.                                                                              | Rosaceae       | X | X | N  |
| <i>Rumex crispus</i> L.                                                                                            | Polygonaceae   | X | X | E  |
| <i>Sarcocornia pacifica</i> (Standl.) A.J. Scott                                                                   | Chenopodiaceae | X | - | N  |
| <i>Salsola soda</i> L.                                                                                             | Chenopodiaceae | X | - | E  |
| <i>Schoenoplectus acutus</i> (Muhl. ex Bigelow) Á. Löve<br>& D. Löve var. <i>occidentalis</i> (Watson) S.G. G. Sm. | Cyperaceae     | X | X | N  |
| <i>Schoenoplectus americanus</i> (Pers.) Volkart ex<br>Schinz & R. Keller                                          | Cyperaceae     | X | X | N  |
| <i>Schoenoplectus californicus</i> (C.A. Mey.) Soják                                                               | Cyperaceae     | X | X | N  |
| <i>Setaria parviflora</i> (Poir.) Kerguélen                                                                        | Poaceae        | X | X | N  |
| <i>Sagittaria latifolia</i> Willd.                                                                                 | Alismataceae   | X | X | N  |
| <i>Solanum physalifolium</i> Rusby                                                                                 | Solanaceae     | X | X | E  |
| <i>Triglochin concinna</i> Burt Davy                                                                               | Juncaginaceae  | X | X | N  |
| <i>Triglochin striata</i> Ruiz & Pav.                                                                              | Juncaginaceae  | - | X | N  |
| <i>Typha angustifolia</i> L.                                                                                       | Typhaceae      | X | X | E  |
| <i>Typha latifolia</i> L.                                                                                          | Typhaceae      | X | X | N  |
| <i>Verbena bonariensis</i> L.                                                                                      | Verbenaceae    | X | X | E  |
| <i>Zeltnera venusta</i> (A. Gray) G. Mans.                                                                         | Gentianaceae   | X | X | N  |

**Table S4.** F-statistics and Pillai's trace from MANOVAs for diversity indices for the factors distribution range (native and invaded), *Iris pseudacorus* presence (with and without *Iris*), locations (grouped in each range sequentially according to their distance to the ocean) and their interactions, with sediment electrical conductivity as covariate, including main effect and model degrees of freedom (d.f.).

| Factors                                 | Pillai's Trace | F      | d.f. | P        |
|-----------------------------------------|----------------|--------|------|----------|
| Range                                   | 0.360          | 23.997 | 3    | < 0.0001 |
| <i>Iris</i> presence                    | 0.131          | 6.410  | 3    | < 0.0001 |
| Location                                | 0.614          | 8.369  | 12   | < 0.0001 |
| Range * <i>Iris</i> presence            | 0.405          | 29.026 | 3    | < 0.0001 |
| Range * Location                        | 0.334          | 4.075  | 12   | < 0.0001 |
| <i>Iris</i> presence * Location         | 0.146          | 1.667  | 12   | 0.072    |
| Range * <i>Iris</i> presence * Location | 0.331          | 4.033  | 12   | < 0.0001 |

**Table S5.** General Linear Model or Generalized Linear Model for the Shannon–Wiener index (H'), species richness (S) and evenness (J') comparing between distribution ranges (native and invaded), presence of *Iris pseudacorus* (with and without *Iris*) and locations (ordered in each range sequentially according to their distance to the ocean) and their corresponding interactions, with sediment electrical conductivity (EC) as covariate. Significant differences are marked in bold.

|                 | EC                            |              | Range                         |                   | <i>Iris</i> presence          |                   | Location                      |                   | Range * <i>Iris</i> presence  |                   | Range * Location              |                   | <i>Iris</i> presence * Location |              | Range * <i>Iris</i> presence * Location |                   |
|-----------------|-------------------------------|--------------|-------------------------------|-------------------|-------------------------------|-------------------|-------------------------------|-------------------|-------------------------------|-------------------|-------------------------------|-------------------|---------------------------------|--------------|-----------------------------------------|-------------------|
|                 | F <sub>1,153</sub> / $\chi^2$ | P            | F <sub>1,153</sub> / $\chi^2$ | P                 | F <sub>1,153</sub> / $\chi^2$ | P                 | F <sub>4,153</sub> / $\chi^2$ | P                 | F <sub>1,153</sub> / $\chi^2$ | P                 | F <sub>4,153</sub> / $\chi^2$ | P                 | F <sub>4,153</sub> / $\chi^2$   | P            | F <sub>4,153</sub> / $\chi^2$           | P                 |
| H' <sup>1</sup> | <b>4.539</b>                  | <b>0.033</b> | <b>28.210</b>                 | <b>&lt;0.0001</b> | 1.425                         | 0.233             | <b>138.071</b>                | <b>&lt;0.0001</b> | <b>55.134</b>                 | <b>&lt;0.0001</b> | <b>15.308</b>                 | <b>0.004</b>      | <b>10.774</b>                   | <b>0.029</b> | <b>12.173</b>                           | <b>0.016</b>      |
| S <sup>2</sup>  | 2.837                         | 0.094        | <b>54.966</b>                 | <b>&lt;0.0001</b> | 0.398                         | 0.529             | <b>38.152</b>                 | <b>&lt;0.0001</b> | <b>17.430</b>                 | <b>&lt;0.0001</b> | <b>6.347</b>                  | <b>&lt;0.0001</b> | <b>2.593</b>                    | <b>0.039</b> | <b>4.407</b>                            | <b>0.002</b>      |
| J' <sup>1</sup> | 1.167                         | 0.280        | 0.717                         | 0.397             | <b>14.291</b>                 | <b>&lt;0.0001</b> | <b>23.722</b>                 | <b>&lt;0.0001</b> | <b>100.196</b>                | <b>&lt;0.0001</b> | <b>9.690</b>                  | <b>0.046</b>      | 5.116                           | 0.276        | <b>22.882</b>                           | <b>&lt;0.0001</b> |

<sup>1</sup>Data analyzed using the Gamma Generalized Linear Model and reporting Chi-square de Wald ( $\chi^2$ ). <sup>2</sup> Square root transformed

**Table S6.** Student t-test or Man-Whitney U-test comparing Shannon–Wiener index (H') (A), number of plant species (S) (B), and evenness (J') (C) without and with *Iris pseudacorus* in its native (Guadalquivir Estuary) and invaded (Sacramento-San Joaquin Delta Estuary) distribution range, including all recorded species in the analyses. Significant differences are marked in bold. d.f., degrees of freedom.

| Native vs invaded distribution range    |                                                    |                                             |
|-----------------------------------------|----------------------------------------------------|---------------------------------------------|
|                                         | Without <i>Iris pseudacorus</i>                    | With <i>Iris pseudacorus</i>                |
| H'                                      | <b>t = -5.473, d.f. = 75, P &lt; 0.0001</b>        | t = 1.276, d.f. = 75, P = 0.206             |
| S                                       | <b>U = 336.500, P &lt; 0.0001</b>                  | t = -1.705, d.f. = 75, P = 0.092            |
| J'                                      | <b>U = 264.500, P &lt; 0.0001</b>                  | <b>U = 144.500, P &lt; 0.0001</b>           |
| Without vs with <i>Iris pseudacorus</i> |                                                    |                                             |
|                                         | Native range                                       | Invaded range                               |
| H'                                      | <b>t = 4.641, d.f. = 74, P &lt; 0.0001</b>         | <b>t = -2.804, d.f. = 76, P = 0.006</b>     |
| S                                       | <b>t = 2.177, d.f. = 74, P = 0.033<sup>1</sup></b> | <b>U = 560.000, P = 0.044</b>               |
| J'                                      | <b>U = 151.500, P &lt; 0.0001</b>                  | <b>t = -4.068, d.f. = 74, P &lt; 0.0001</b> |

<sup>1</sup> Square root transformed



**Table S7.** Student t-test or Man-Whitney U-test comparing Shannon–Wiener index (H') (A), number of plant species (S) (B), and evenness (J') (C) without and with *Iris pseudacorus* in intertidal marshes within its native (Guadalquivir Estuary) and invaded (Sacramento-San Joaquin Delta Estuary) distribution range, including only native species in the analyses. Significant differences are marked in bold. d.f., degrees of freedom.

| Native vs invaded distribution range    |                                             |                                         |
|-----------------------------------------|---------------------------------------------|-----------------------------------------|
|                                         | Without <i>Iris pseudacorus</i>             | With <i>Iris pseudacorus</i>            |
| H'                                      | <b>t = -3.765, d.f. = 75, P &lt; 0.0001</b> | <b>t = 2.833, d.f. = 75, P = 0.006</b>  |
| S                                       | <b>U = 451.000, P = 0.003</b>               | t = 0.186, d.f. = 75, P = 0.853         |
| J'                                      | <b>U = 319.000, P &lt; 0.0001</b>           | <b>U = 148.000, P &lt; 0.0001</b>       |
| Without vs with <i>Iris pseudacorus</i> |                                             |                                         |
|                                         | Native range                                | Invaded range                           |
| H'                                      | <b>t = 4.678, d.f. = 74, P &lt; 0.0001</b>  | <b>t = -2.280, d.f. = 76, P = 0.025</b> |
| S                                       | <b>t = 2.385, d.f. = 74, P = 0.020</b>      | U = 587.000, P = 0.081                  |
| J'                                      | <b>U = 166.500, P &lt; 0.0001</b>           | <b>t = -2.616, d.f. = 71, P = 0.011</b> |

**Table S8.** Generalized Linear Model for Morisita-Horn dissimilarity index comparing plant communities with and without *Iris pseudacorus* and between its distribution ranges (native and invaded).

|                              | Chi-square of<br>Wald | Degrees of<br>freedom | P        |
|------------------------------|-----------------------|-----------------------|----------|
| Intersection                 | 58146.685             | 1                     | < 0.0001 |
| Range                        | 21.296                | 1                     | < 0.0001 |
| <i>Iris</i> presence         | 6431.517              | 2                     | < 0.0001 |
| Range * <i>Iris</i> presence | 360.949               | 2                     | < 0.0001 |

**Table S9.** Generalized Linear Model for Sørensen dissimilarity index comparing plant communities with and without *Iris pseudacorus* and between its distribution ranges (native and invaded).

|                              | Chi-square of<br>Wald | Degrees of<br>freedom | P        |
|------------------------------|-----------------------|-----------------------|----------|
| Intersection                 | 112559.446            | 1                     | < 0.0001 |
| Range                        | 411.958               | 1                     | < 0.0001 |
| <i>Iris</i> presence         | 987.281               | 2                     | < 0.0001 |
| Range * <i>Iris</i> presence | 12.563                | 2                     | 0.002    |

**Table S10.** Indicator values for the simultaneous occurrence of plant species with *Iris pseudacorus* (Irps) in intertidal marshes within its native and invaded ranges. A, Positive predictive power of species combinations; B, Sensitivity of species combinations; sqrtIV, Square root of indicator value of species combinations; P, P-value of the permutation test of statistical significance. We show results with sqrtIV > 0.05.

|                                             | A | B     | sqrtIV | P     |
|---------------------------------------------|---|-------|--------|-------|
| Native range                                |   |       |        |       |
| Irps + <i>Polygonum salicifolium</i> (Posa) | 1 | 0.553 | 0.743  | 0.005 |
| Irps + <i>Cynodon dactylon</i>              | 1 | 0.553 | 0.743  | 0.005 |
| Irps + <i>Oenanthe lachenalii</i> (Oela)    | 1 | 0.526 | 0.725  | 0.005 |
| Irps + <i>Phragmites australis</i> (Phau)   | 1 | 0.526 | 0.725  | 0.005 |
| Irps + <i>Scirpus maritimus</i> (Scma)      | 1 | 0.447 | 0.669  | 0.005 |
| Irps + Oela + Phau                          | 1 | 0.447 | 0.669  | 0.005 |
| Irps + Oela + Posa                          | 1 | 0.421 | 0.649  | 0.005 |
| Irps + Oela + Scma                          | 1 | 0.421 | 0.649  | 0.005 |
| Irps + <i>Atriplex chenopodioides</i>       | 1 | 0.368 | 0.607  | 0.005 |
| Irps + Phau + Scma                          | 1 | 0.368 | 0.607  | 0.005 |
| Invaded range                               |   |       |        |       |
| Irps + <i>Juncus balticus</i> (Juba)        | 1 | 0.487 | 0.698  | 0.005 |
| Irps + <i>Calystegia sepium</i> (Case)      | 1 | 0.385 | 0.620  | 0.005 |
| Irps + <i>Schoenoplectus acutus</i>         | 1 | 0.385 | 0.620  | 0.005 |
| Irps + Case + Juba                          | 1 | 0.256 | 0.506  | 0.005 |
| Irps + <i>Schoenoplectus californicus</i>   | 1 | 0.256 | 0.506  | 0.005 |
